# Supplementary material
Source: Springer Nature journal article supplement (https://www.springermedizin.de/resource/supplementary/12997_2012_85_MOESM1_ESM.pdf/9623274)

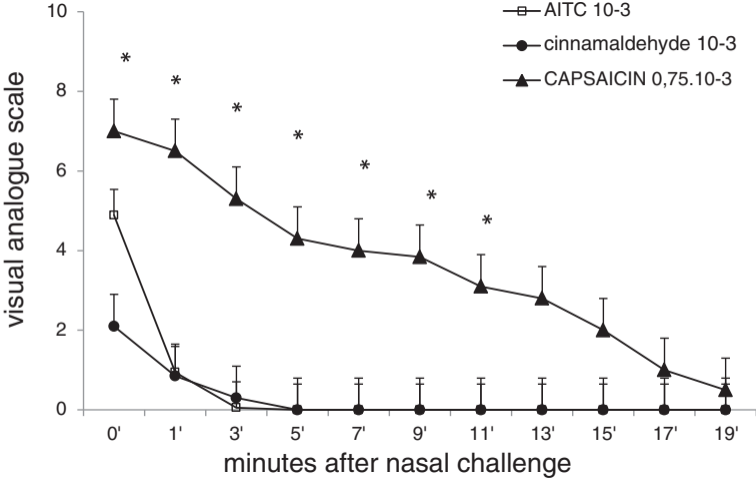

Supplement: MOESM1 [file 9623274]
